# Supplementary material
Source: MDPI journal article supplement (https://www.mdpi.com/2220-9964/6/9/287)
Supplement: s1 [file s1]

Table S1. C parameters global (NSC) and by Slope Class (SC) for each band, slope class, and date of study.

| Sensor Date            | Slope range | Blue     |           | Green    |           | Red      |           | NIR      |           | SWIR-1   |           | SWIR-2   |           |
|------------------------|-------------|----------|-----------|----------|-----------|----------|-----------|----------|-----------|----------|-----------|----------|-----------|
|                        |             | NSC      | SC        |
| Landsat TM Nov-27-1995 | 0 - 5       | 0.412907 | -0.069351 | 0.219975 | -0.161242 | 0.140651 | -0.209452 | 0.254546 | -0.132535 | 0.058313 | -0.232176 | 0.012131 | -0.264346 |
|                        | 5 - 10      |          | 0.215600  |          | 0.089060  |          | 0.002576  |          | 0.194710  |          | -0.048601 |          | -0.102372 |
|                        | 10 - 15     |          | 0.265409  |          | 0.137577  |          | 0.036285  |          | 0.280525  |          | -0.015054 |          | -0.083181 |
|                        | 15 - 20     |          | 0.312789  |          | 0.164437  |          | 0.059705  |          | 0.293145  |          | 0.004482  |          | -0.065790 |
|                        | 20 - 25     |          | 0.371970  |          | 0.192888  |          | 0.088978  |          | 0.288805  |          | 0.028783  |          | -0.039016 |
|                        | 25 - 30     |          | 0.420248  |          | 0.206730  |          | 0.113594  |          | 0.257170  |          | 0.045759  |          | -0.012260 |
|                        | 30 - 35     |          | 0.462577  |          | 0.219152  |          | 0.141692  |          | 0.229691  |          | 0.062906  |          | 0.015579  |
|                        | 35 - 40     |          | 0.515769  |          | 0.244053  |          | 0.179276  |          | 0.225106  |          | 0.088976  |          | 0.049952  |
|                        | > 40        |          | 0.598705  |          | 0.315476  |          | 0.262127  |          | 0.276856  |          | 0.162869  |          | 0.129818  |

| Sensor Date              | Slope range | Blue     |           | Green    |           | Red      |           | NIR      |           | SWIR-1   |           | SWIR-2    |           |
|--------------------------|-------------|----------|-----------|----------|-----------|----------|-----------|----------|-----------|----------|-----------|-----------|-----------|
|                          |             | NSC      | SC        | NSC       | SC        |
| Landsat ETM+ Dec-02-2000 | 0 - 5       | 0.507569 | -0.170752 | 0.272552 | -0.242404 | 0.079892 | -0.322035 | 0.381640 | -0.137092 | 0.051280 | -0.285188 | -0.014019 | -0.336251 |
|                          | 5 - 10      |          | 0.253532  |          | 0.102180  |          | -0.064894 |          | 0.300641  |          | -0.067267 |           | -0.134153 |
|                          | 10 - 15     |          | 0.360287  |          | 0.180028  |          | -0.013585 |          | 0.390083  |          | -0.027932 |           | -0.104530 |
|                          | 15 - 20     |          | 0.437465  |          | 0.224697  |          | 0.018241  |          | 0.398380  |          | -0.002571 |           | -0.081873 |
|                          | 20 - 25     |          | 0.533986  |          | 0.274926  |          | 0.056178  |          | 0.402821  |          | 0.029717  |           | -0.049461 |
|                          | 25 - 30     |          | 0.600004  |          | 0.300900  |          | 0.080786  |          | 0.381277  |          | 0.048685  |           | -0.024444 |
|                          | 30 - 35     |          | 0.643521  |          | 0.316682  |          | 0.102066  |          | 0.354382  |          | 0.064687  |           | 0.000575  |
|                          | 35 - 40     |          | 0.691756  |          | 0.339767  |          | 0.133931  |          | 0.329454  |          | 0.086738  |           | 0.033009  |
|                          | > 40        |          | 0.752321  |          | 0.390357  |          | 0.202227  |          | 0.321365  |          | 0.142702  |           | 0.100576  |

| Sensor Date             | Slope range | Blue     |           | Green    |           | Red      |           | NIR      |           | SWIR-1   |           | SWIR-2   |           |
|-------------------------|-------------|----------|-----------|----------|-----------|----------|-----------|----------|-----------|----------|-----------|----------|-----------|
|                         |             | NSC      | SC        |
| Landsat OLI Mar-07-2015 | 0 - 5       | 0.122620 | -0.370957 | 0.104809 | -0.387675 | 0.028729 | -0.395485 | 0.352443 | -0.307607 | 0.074122 | -0.289661 | 0.010785 | -0.332281 |
|                         | 5 - 10      |          | -0.036329 |          | -0.062828 |          | -0.098144 |          | 0.083100  |          | -0.031223 |          | -0.070122 |
|                         | 10 - 15     |          | 0.061287  |          | 0.040261  |          | -0.021606 |          | 0.227175  |          | 0.008816  |          | -0.038421 |
|                         | 15 - 20     |          | 0.118201  |          | 0.102388  |          | 0.023034  |          | 0.302335  |          | 0.037757  |          | -0.013817 |
|                         | 20 - 25     |          | 0.164557  |          | 0.144364  |          | 0.055700  |          | 0.335511  |          | 0.071094  |          | 0.017019  |
|                         | 25 - 30     |          | 0.188054  |          | 0.158794  |          | 0.064502  |          | 0.339546  |          | 0.080136  |          | 0.028954  |
|                         | 30 - 35     |          | 0.201539  |          | 0.165606  |          | 0.069947  |          | 0.334235  |          | 0.088039  |          | 0.041865  |
|                         | 35 - 40     |          | 0.240192  |          | 0.193101  |          | 0.100872  |          | 0.334131  |          | 0.110019  |          | 0.068818  |
|                         | > 40        |          | 0.313419  |          | 0.248986  |          | 0.169512  |          | 0.315379  |          | 0.160503  |          | 0.131535  |
