# Supplementary material
Source: MDPI journal article supplement (https://www.mdpi.com/2220-9964/6/9/287)
Supplement: s1 [file s1]

Table S2. Standard deviation Mean reflectance values before and after applying the topographic correction by N-SC and SC for each band and each slope class of oak, pine, and mesophyll forest.

| Forest Sample            |                       |                               |                              |         |                               |                              |         |                               |                              |         |                               |                              |         |                               |                              |         |                               |                              |         |
|--------------------------|-----------------------|-------------------------------|------------------------------|---------|-------------------------------|------------------------------|---------|-------------------------------|------------------------------|---------|-------------------------------|------------------------------|---------|-------------------------------|------------------------------|---------|-------------------------------|------------------------------|---------|
| Sensor Date              | Slope range (Degrees) | Blue                          |                              |         | Green                         |                              |         | Red                           |                              |         | NIR                           |                              |         | SWIR-1                        |                              |         | SWIR-2                        |                              |         |
|                          |                       | Before Topographic Correction | After Topographic Correction |         | Before Topographic Correction | After Topographic Correction |         | Before Topographic Correction | After Topographic Correction |         | Before Topographic Correction | After Topographic Correction |         | Before Topographic Correction | After Topographic Correction |         | Before Topographic Correction | After Topographic Correction |         |
|                          |                       |                               | NSC                          | SC      |
| Landsat TM Nov-27-1995   | 0                     | 0.00235                       | 0.00235                      | 0.00235 | 0.00225                       | 0.00225                      | 0.00225 | 0.00000                       | 0.00000                      | 0.00000 | 0.00705                       | 0.00705                      | 0.00705 | 0.01725                       | 0.01725                      | 0.01725 | 0.01170                       | 0.01170                      | 0.01170 |
|                          | 0 - 5                 | 0.00364                       | 0.00353                      | 0.00346 | 0.00562                       | 0.00534                      | 0.00529 | 0.00608                       | 0.00581                      | 0.00574 | 0.04227                       | 0.04084                      | 0.04077 | 0.02679                       | 0.02544                      | 0.02539 | 0.01435                       | 0.01380                      | 0.01376 |
|                          | 5 - 10                | 0.00445                       | 0.00426                      | 0.00411 | 0.00855                       | 0.00764                      | 0.00766 | 0.00818                       | 0.00764                      | 0.00763 | 0.06692                       | 0.06211                      | 0.06212 | 0.04112                       | 0.03616                      | 0.03650 | 0.02018                       | 0.01792                      | 0.01818 |
|                          | 10 - 15               | 0.00461                       | 0.00479                      | 0.00494 | 0.00785                       | 0.00882                      | 0.00877 | 0.01044                       | 0.01235                      | 0.01197 | 0.05489                       | 0.05979                      | 0.05625 | 0.03692                       | 0.04090                      | 0.04368 | 0.02054                       | 0.02381                      | 0.02610 |
|                          | 15 - 20               | 0.00510                       | 0.00473                      | 0.00499 | 0.00898                       | 0.00846                      | 0.00836 | 0.01041                       | 0.01197                      | 0.01161 | 0.06317                       | 0.05768                      | 0.05681 | 0.04538                       | 0.03898                      | 0.04146 | 0.02323                       | 0.02168                      | 0.02408 |
|                          | 20 - 25               | 0.00599                       | 0.00456                      | 0.00468 | 0.01119                       | 0.00841                      | 0.00856 | 0.01191                       | 0.01028                      | 0.01031 | 0.07928                       | 0.05594                      | 0.05546 | 0.05696                       | 0.03602                      | 0.03750 | 0.02809                       | 0.01996                      | 0.02208 |
|                          | 25 - 30               | 0.00702                       | 0.00476                      | 0.00473 | 0.01319                       | 0.00781                      | 0.00792 | 0.01409                       | 0.00980                      | 0.00973 | 0.09230                       | 0.05302                      | 0.05296 | 0.06839                       | 0.03723                      | 0.03850 | 0.03356                       | 0.02212                      | 0.02422 |
|                          | 30 - 35               | 0.00833                       | 0.00455                      | 0.00433 | 0.01561                       | 0.00717                      | 0.00717 | 0.01659                       | 0.00899                      | 0.00897 | 0.11152                       | 0.05328                      | 0.05328 | 0.08191                       | 0.03930                      | 0.03860 | 0.03967                       | 0.02608                      | 0.02537 |
|                          | 35 - 40               | 0.00872                       | 0.00457                      | 0.00386 | 0.01664                       | 0.00681                      | 0.00641 | 0.01772                       | 0.01010                      | 0.00839 | 0.12203                       | 0.04879                      | 0.04897 | 0.08833                       | 0.06147                      | 0.04244 | 0.04212                       | 0.11415                      | 0.03605 |
|                          | > 40                  | 0.00854                       | 0.00455                      | 0.00350 | 0.01598                       | 0.00585                      | 0.00483 | 0.02063                       | 0.01293                      | 0.00845 | 0.11017                       | 0.02961                      | 0.03162 | 0.08243                       | 0.17290                      | 0.02296 | 0.04152                       | 0.07955                      | 0.01503 |
| Mean                     |                       | 0.0059                        | 0.0043                       | 0.0041  | 0.0106                        | 0.0069                       | 0.0067  | 0.0116                        | 0.0090                       | 0.0083  | 0.0750                        | 0.0468                       | 0.0465  | 0.0545                        | 0.0506                       | 0.0344  | 0.0275                        | 0.0351                       | 0.0217  |
| Forest Sample            |                       |                               |                              |         |                               |                              |         |                               |                              |         |                               |                              |         |                               |                              |         |                               |                              |         |
| Sensor Date              | Slope range (Degrees) | Blue                          |                              |         | Green                         |                              |         | Red                           |                              |         | NIR                           |                              |         | SWIR-1                        |                              |         | SWIR-2                        |                              |         |
|                          |                       | Before Topographic Correction | After Topographic Correction |         | Before Topographic Correction | After Topographic Correction |         | Before Topographic Correction | After Topographic Correction |         | Before Topographic Correction | After Topographic Correction |         | Before Topographic Correction | After Topographic Correction |         | Before Topographic Correction | After Topographic Correction |         |
|                          |                       |                               | NSC                          | SC      |
| Landsat ETM+ Dec-02-2000 | 0                     | 0.00000                       | 0.00000                      | 0.00000 | 0.00490                       | 0.00490                      | 0.00490 | 0.00320                       | 0.00320                      | 0.00320 | 0.00935                       | 0.00935                      | 0.00935 | 0.00545                       | 0.00545                      | 0.00545 | 0.00565                       | 0.00565                      | 0.00565 |
|                          | 0 - 5                 | 0.00378                       | 0.00374                      | 0.00371 | 0.00599                       | 0.00579                      | 0.00566 | 0.00819                       | 0.00819                      | 0.00813 | 0.03168                       | 0.03005                      | 0.02958 | 0.02714                       | 0.02604                      | 0.02598 | 0.01991                       | 0.01966                      | 0.01929 |
|                          | 5 - 10                | 0.00421                       | 0.00370                      | 0.00366 | 0.00736                       | 0.00627                      | 0.00620 | 0.00842                       | 0.00786                      | 0.00774 | 0.04749                       | 0.04089                      | 0.04062 | 0.03716                       | 0.03332                      | 0.03358 | 0.01982                       | 0.01923                      | 0.01921 |
|                          | 10 - 15               | 0.00418                       | 0.00372                      | 0.00379 | 0.00703                       | 0.00616                      | 0.00630 | 0.00989                       | 0.01087                      | 0.01043 | 0.03895                       | 0.03580                      | 0.03575 | 0.03929                       | 0.04232                      | 0.04109 | 0.02361                       | 0.02558                      | 0.02690 |
|                          | 15 - 20               | 0.00450                       | 0.00383                      | 0.00380 | 0.00800                       | 0.00648                      | 0.00659 | 0.01075                       | 0.01045                      | 0.01047 | 0.04544                       | 0.03575                      | 0.03564 | 0.04301                       | 0.04217                      | 0.04173 | 0.02545                       | 0.02534                      | 0.02666 |
|                          | 20 - 25               | 0.00527                       | 0.00403                      | 0.00400 | 0.00982                       | 0.00654                      | 0.00653 | 0.01188                       | 0.00993                      | 0.00981 | 0.05765                       | 0.03717                      | 0.03709 | 0.05065                       | 0.03690                      | 0.03764 | 0.02796                       | 0.02479                      | 0.02395 |
|                          | 25 - 30               | 0.00586                       | 0.00421                      | 0.00407 | 0.01112                       | 0.00659                      | 0.00648 | 0.01372                       | 0.00944                      | 0.00944 | 0.06372                       | 0.03580                      | 0.03581 | 0.05753                       | 0.03587                      | 0.03601 | 0.03171                       | 0.02354                      | 0.02395 |
|                          | 30 - 35               | 0.00669                       | 0.00393                      | 0.00374 | 0.01340                       | 0.00609                      | 0.00597 | 0.01602                       | 0.00900                      | 0.00889 | 0.07781                       | 0.03482                      | 0.03497 | 0.06810                       | 0.03279                      | 0.03186 | 0.03701                       | 0.02230                      | 0.02149 |
|                          | 35 - 40               | 0.00721                       | 0.00376                      | 0.00347 | 0.01412                       | 0.00565                      | 0.00530 | 0.01625                       | 0.00860                      | 0.00790 | 0.08770                       | 0.03596                      | 0.03606 | 0.07335                       | 0.03543                      | 0.03111 | 0.03860                       | 0.02529                      | 0.01986 |
|                          | > 40                  | 0.00760                       | 0.00404                      | 0.00389 | 0.01434                       | 0.00526                      | 0.00528 | 0.01932                       | 0.01062                      | 0.00947 | 0.08269                       | 0.02978                      | 0.02805 | 0.07564                       | 0.03039                      | 0.02671 | 0.04522                       | 0.02991                      | 0.01915 |
| Mean                     |                       | 0.0049                        | 0.0035                       | 0.0034  | 0.0096                        | 0.0060                       | 0.0059  | 0.0118                        | 0.0088                       | 0.0085  | 0.0542                        | 0.0325                       | 0.0323  | 0.0477                        | 0.0321                       | 0.0311  | 0.0275                        | 0.0221                       | 0.0206  |
| Forest Sample            |                       |                               |                              |         |                               |                              |         |                               |                              |         |                               |                              |         |                               |                              |         |                               |                              |         |
| Sensor Date              | Slope range (Degrees) | Blue                          |                              |         | Green                         |                              |         | Red                           |                              |         | NIR                           |                              |         | SWIR-1                        |                              |         | SWIR-2                        |                              |         |
|                          |                       | Before Topographic Correction | After Topographic Correction |         | Before Topographic Correction | After Topographic Correction |         | Before Topographic Correction | After Topographic Correction |         | Before Topographic Correction | After Topographic Correction |         | Before Topographic Correction | After Topographic Correction |         | Before Topographic Correction | After Topographic Correction |         |
|                          |                       |                               | NSC                          | SC      |
| Landsat OLI Mar-07-2015  | 0                     | 0.00190                       | 0.00190                      | 0.00190 | 0.00195                       | 0.00195                      | 0.00195 | 0.00425                       | 0.00425                      | 0.00425 | 0.00160                       | 0.00160                      | 0.00160 | 0.01150                       | 0.01150                      | 0.01150 | 0.01130                       | 0.01130                      | 0.01130 |
|                          | 0 - 5                 | 0.01375                       | 0.01333                      | 0.01227 | 0.01776                       | 0.01710                      | 0.01647 | 0.02460                       | 0.02391                      | 0.02336 | 0.03680                       | 0.04053                      | 0.03593 | 0.05179                       | 0.05101                      | 0.05083 | 0.03263                       | 0.03182                      | 0.03145 |
|                          | 5 - 10                | 0.01109                       | 0.01010                      | 0.00996 | 0.01783                       | 0.01588                      | 0.01556 | 0.02632                       | 0.02380                      | 0.02346 | 0.04112                       | 0.03770                      | 0.03760 | 0.05625                       | 0.04868                      | 0.04800 | 0.03541                       | 0.03094                      | 0.03061 |
|                          | 10 - 15               | 0.00761                       | 0.00731                      | 0.00700 | 0.01220                       | 0.01249                      | 0.01087 | 0.01913                       | 0.01885                      | 0.01802 | 0.03891                       | 0.03244                      | 0.03241 | 0.05297                       | 0.05531                      | 0.05332 | 0.03495                       | 0.04255                      | 0.03726 |
|                          | 15 - 20               | 0.00781                       | 0.00704                      | 0.00669 | 0.01271                       | 0.01166                      | 0.01007 | 0.01996                       | 0.01861                      | 0.01770 | 0.03896                       | 0.02646                      | 0.02636 | 0.05503                       | 0.05427                      | 0.05213 | 0.03719                       | 0.03946                      | 0.03979 |
|                          | 20 - 25               | 0.00802                       | 0.00616                      | 0.00611 | 0.01339                       | 0.00915                      | 0.00913 | 0.02087                       | 0.01673                      | 0.01668 | 0.04630                       | 0.02495                      | 0.02486 | 0.06051                       | 0.04703                      | 0.04706 | 0.03841                       | 0.03461                      | 0.03454 |
|                          | 25 - 30               | 0.00919                       | 0.00570                      | 0.00563 | 0.01544                       | 0.00812                      | 0.00813 | 0.02413                       | 0.01514                      | 0.01447 | 0.05435                       | 0.02565                      | 0.02561 | 0.07034                       | 0.04012                      | 0.04011 | 0.04306                       | 0.02971                      | 0.02959 |
|                          | 30 - 35               | 0.01047                       | 0.00600                      | 0.00531 | 0.01778                       | 0.00804                      | 0.00796 | 0.02772                       | 0.01443                      | 0.01460 | 0.06258                       | 0.02595                      | 0.02590 | 0.08026                       | 0.03538                      | 0.03540 | 0.04751                       | 0.02528                      | 0.02507 |
|                          | 35 - 40               | 0.01207                       | 0.00601                      | 0.00562 | 0.02021                       | 0.00839                      | 0.00807 | 0.03143                       | 0.01475                      | 0.01425 | 0.06926                       | 0.02402                      | 0.02393 | 0.08913                       | 0.03442                      | 0.03415 | 0.05443                       | 0.02520                      | 0.02454 |
|                          | > 40                  | 0.01068                       | 0.00558                      | 0.00486 | 0.01689                       | 0.00774                      | 0.00669 | 0.02682                       | 0.01252                      | 0.01235 | 0.05552                       | 0.02241                      | 0.02286 | 0.07743                       | 0.02808                      | 0.02716 | 0.04998                       | 0.02094                      | 0.02007 |
| Mean                     |                       | 0.0093                        | 0.0069                       | 0.0065  | 0.0146                        | 0.0101                       | 0.0095  | 0.0225                        | 0.0163                       | 0.0159  | 0.0445                        | 0.0262                       | 0.0257  | 0.0605                        | 0.0406                       | 0.0400  | 0.0385                        | 0.0292                       | 0.0284  |
