# Supplementary material
Source: MDPI journal article supplement (https://www.mdpi.com/2220-9964/6/9/287)
Supplement: s1 [file s1]

Table S3. Mean standard deviation values before and after applying the topographic correction by N-SC and SC for each band and each slope class of deciduous forest.

| Deciduous Forest Sample  |                       |                               |                              |         |                               |                              |         |                               |                              |         |                               |                              |         |                               |                              |         |                               |                              |         |
|--------------------------|-----------------------|-------------------------------|------------------------------|---------|-------------------------------|------------------------------|---------|-------------------------------|------------------------------|---------|-------------------------------|------------------------------|---------|-------------------------------|------------------------------|---------|-------------------------------|------------------------------|---------|
| Sensor Date              | Slope range (Degrees) | Blue                          |                              |         | Green                         |                              |         | Red                           |                              |         | NIR                           |                              |         | SWIR-1                        |                              |         | SWIR-2                        |                              |         |
|                          |                       | Before Topographic Correction | After Topographic Correction |         | Before Topographic Correction | After Topographic Correction |         | Before Topographic Correction | After Topographic Correction |         | Before Topographic Correction | After Topographic Correction |         | Before Topographic Correction | After Topographic Correction |         | Before Topographic Correction | After Topographic Correction |         |
|                          |                       |                               | NSC                          | SC      |
| Landsat TM Nov-27-1995   | 0                     | 0.01416                       | 0.01416                      | 0.01416 | 0.01908                       | 0.01908                      | 0.01908 | 0.02489                       | 0.02489                      | 0.02489 | 0.03731                       | 0.03731                      | 0.03731 | 0.05632                       | 0.05632                      | 0.05632 | 0.04788                       | 0.04788                      | 0.04788 |
|                          | 0 - 5                 | 0.01257                       | 0.01206                      | 0.01172 | 0.01679                       | 0.01602                      | 0.01555 | 0.02291                       | 0.02188                      | 0.02124 | 0.04493                       | 0.04296                      | 0.04196 | 0.06596                       | 0.06203                      | 0.05997 | 0.04961                       | 0.04690                      | 0.04542 |
|                          | 5 - 10                | 0.01172                       | 0.01002                      | 0.00976 | 0.01519                       | 0.01274                      | 0.01248 | 0.02131                       | 0.01801                      | 0.01758 | 0.04133                       | 0.03573                      | 0.03556 | 0.06156                       | 0.04925                      | 0.04802 | 0.04507                       | 0.03651                      | 0.03548 |
|                          | 10 - 15               | 0.00954                       | 0.00892                      | 0.00866 | 0.01257                       | 0.01144                      | 0.01109 | 0.01744                       | 0.01616                      | 0.01580 | 0.04236                       | 0.03674                      | 0.03665 | 0.05269                       | 0.04185                      | 0.04277 | 0.04020                       | 0.03269                      | 0.03348 |
|                          | 15 - 20               | 0.00999                       | 0.00828                      | 0.00849 | 0.01376                       | 0.01072                      | 0.01097 | 0.01881                       | 0.01533                      | 0.01595 | 0.04809                       | 0.03563                      | 0.03546 | 0.06461                       | 0.04154                      | 0.04247 | 0.04743                       | 0.03199                      | 0.03308 |
|                          | 20 - 25               | 0.01068                       | 0.00780                      | 0.00788 | 0.01498                       | 0.01026                      | 0.01040 | 0.02060                       | 0.01452                      | 0.01497 | 0.05063                       | 0.03470                      | 0.03446 | 0.07303                       | 0.04066                      | 0.04116 | 0.05297                       | 0.03193                      | 0.03294 |
|                          | 25 - 30               | 0.01177                       | 0.00760                      | 0.00758 | 0.01739                       | 0.01046                      | 0.01057 | 0.02333                       | 0.01448                      | 0.01409 | 0.06097                       | 0.03656                      | 0.03655 | 0.08573                       | 0.04497                      | 0.04550 | 0.06022                       | 0.03442                      | 0.03583 |
|                          | 30 - 35               | 0.01288                       | 0.00718                      | 0.00702 | 0.01979                       | 0.01026                      | 0.01027 | 0.02572                       | 0.01408                      | 0.01406 | 0.06912                       | 0.03649                      | 0.03661 | 0.09689                       | 0.05049                      | 0.04994 | 0.06644                       | 0.04012                      | 0.03944 |
|                          | 35 - 40               | 0.01460                       | 0.00693                      | 0.00648 | 0.02263                       | 0.01020                      | 0.00980 | 0.02927                       | 0.01428                      | 0.01278 | 0.07865                       | 0.03592                      | 0.03606 | 0.10892                       | 0.07023                      | 0.05060 | 0.07419                       | 0.11821                      | 0.05176 |
|                          | > 40                  | 0.01666                       | 0.01478                      | 0.00730 | 0.02570                       | 0.08168                      | 0.03704 | 0.03252                       | 0.12923                      | 0.05799 | 0.09102                       | 0.10520                      | 0.09208 | 0.11997                       | 0.18990                      | 0.13845 | 0.08169                       | 0.13183                      | 0.11874 |
| Mean                     |                       | 0.0125                        | 0.0098                       | 0.0089  | 0.0178                        | 0.0193                       | 0.0147  | 0.0237                        | 0.0283                       | 0.0209  | 0.0564                        | 0.0437                       | 0.0423  | 0.0786                        | 0.0647                       | 0.0575  | 0.0566                        | 0.0552                       | 0.0474  |
| Deciduous Forest Sample  |                       |                               |                              |         |                               |                              |         |                               |                              |         |                               |                              |         |                               |                              |         |                               |                              |         |
| Sensor Date              | Slope range (Degrees) | Blue                          |                              |         | Green                         |                              |         | Red                           |                              |         | NIR                           |                              |         | SWIR-1                        |                              |         | SWIR-2                        |                              |         |
|                          |                       | Before Topographic Correction | After Topographic Correction |         | Before Topographic Correction | After Topographic Correction |         | Before Topographic Correction | After Topographic Correction |         | Before Topographic Correction | After Topographic Correction |         | Before Topographic Correction | After Topographic Correction |         | Before Topographic Correction | After Topographic Correction |         |
|                          |                       |                               | NSC                          | SC      |
| Landsat ETM+ Dec-02-2000 | 0                     | 0.01308                       | 0.01308                      | 0.01308 | 0.01779                       | 0.01779                      | 0.01779 | 0.02324                       | 0.02324                      | 0.02324 | 0.02589                       | 0.02589                      | 0.02589 | 0.04128                       | 0.04128                      | 0.04128 | 0.03442                       | 0.03442                      | 0.03442 |
|                          | 0 - 5                 | 0.00949                       | 0.00906                      | 0.00868 | 0.01353                       | 0.01281                      | 0.01225 | 0.01909                       | 0.01809                      | 0.01735 | 0.03076                       | 0.02911                      | 0.02813 | 0.04754                       | 0.04439                      | 0.04268 | 0.03470                       | 0.03248                      | 0.03117 |
|                          | 5 - 10                | 0.00854                       | 0.00743                      | 0.00729 | 0.01216                       | 0.01017                      | 0.00994 | 0.01678                       | 0.01416                      | 0.01389 | 0.03119                       | 0.02620                      | 0.02599 | 0.04284                       | 0.03411                      | 0.03351 | 0.03079                       | 0.02527                      | 0.02491 |
|                          | 10 - 15               | 0.00775                       | 0.00718                      | 0.00732 | 0.01085                       | 0.00981                      | 0.01000 | 0.01642                       | 0.01488                      | 0.01523 | 0.03102                       | 0.02594                      | 0.02593 | 0.04457                       | 0.03561                      | 0.03630 | 0.03262                       | 0.02668                      | 0.02731 |
|                          | 15 - 20               | 0.00793                       | 0.00668                      | 0.00680 | 0.01157                       | 0.00921                      | 0.00939 | 0.01802                       | 0.01441                      | 0.01483 | 0.03428                       | 0.02499                      | 0.02494 | 0.05356                       | 0.03487                      | 0.03557 | 0.03795                       | 0.02551                      | 0.02630 |
|                          | 20 - 25               | 0.00875                       | 0.00633                      | 0.00629 | 0.01282                       | 0.00897                      | 0.00896 | 0.02033                       | 0.01425                      | 0.01444 | 0.03652                       | 0.02475                      | 0.02464 | 0.06101                       | 0.03392                      | 0.03418 | 0.04341                       | 0.02500                      | 0.02548 |
|                          | 25 - 30               | 0.01026                       | 0.00593                      | 0.00577 | 0.01574                       | 0.00888                      | 0.00874 | 0.02399                       | 0.01381                      | 0.01380 | 0.04428                       | 0.02594                      | 0.02594 | 0.07366                       | 0.03698                      | 0.03703 | 0.05184                       | 0.02686                      | 0.02713 |
|                          | 30 - 35               | 0.01174                       | 0.00549                      | 0.00530 | 0.01834                       | 0.00846                      | 0.00825 | 0.02751                       | 0.01297                      | 0.01265 | 0.05125                       | 0.02565                      | 0.02565 | 0.08349                       | 0.03932                      | 0.03880 | 0.05824                       | 0.02936                      | 0.02850 |
|                          | 35 - 40               | 0.01357                       | 0.00573                      | 0.00520 | 0.02107                       | 0.00896                      | 0.00820 | 0.03117                       | 0.01470                      | 0.01245 | 0.06111                       | 0.02737                      | 0.02724 | 0.09663                       | 0.04475                      | 0.04097 | 0.06746                       | 0.03985                      | 0.03051 |
|                          | > 40                  | 0.01563                       | 0.00878                      | 0.00570 | 0.02446                       | 0.03520                      | 0.01141 | 0.03492                       | 0.12357                      | 0.04627 | 0.07609                       | 0.03633                      | 0.04267 | 0.11204                       | 0.18812                      | 0.11785 | 0.07795                       | 0.18395                      | 0.11867 |
| Mean                     |                       | 0.0107                        | 0.0076                       | 0.0071  | 0.0158                        | 0.0130                       | 0.0105  | 0.0231                        | 0.0264                       | 0.0184  | 0.0422                        | 0.0272                       | 0.0277  | 0.0657                        | 0.0533                       | 0.0458  | 0.0469                        | 0.0449                       | 0.0374  |
| Deciduous Forest Sample  |                       |                               |                              |         |                               |                              |         |                               |                              |         |                               |                              |         |                               |                              |         |                               |                              |         |
| Sensor Date              | Slope range (Degrees) | Blue                          |                              |         | Green                         |                              |         | Red                           |                              |         | NIR                           |                              |         | SWIR-1                        |                              |         | SWIR-2                        |                              |         |
|                          |                       | Before Topographic Correction | After Topographic Correction |         | Before Topographic Correction | After Topographic Correction |         | Before Topographic Correction | After Topographic Correction |         | Before Topographic Correction | After Topographic Correction |         | Before Topographic Correction | After Topographic Correction |         | Before Topographic Correction | After Topographic Correction |         |
|                          |                       |                               | NSC                          | SC      |
| Landsat OLI Mar-07-2015  | 0                     | 0.02544                       | 0.02544                      | 0.02544 | 0.03631                       | 0.03631                      | 0.03631 | 0.04137                       | 0.04137                      | 0.04137 | 0.03335                       | 0.03335                      | 0.03335 | 0.03737                       | 0.03737                      | 0.03737 | 0.04215                       | 0.04215                      | 0.04215 |
|                          | 0 - 5                 | 0.01702                       | 0.01671                      | 0.01649 | 0.02444                       | 0.02401                      | 0.02371 | 0.02815                       | 0.02755                      | 0.02718 | 0.03243                       | 0.03136                      | 0.03053 | 0.03924                       | 0.03684                      | 0.03573 | 0.03204                       | 0.03064                      | 0.03004 |
|                          | 5 - 10                | 0.01385                       | 0.01269                      | 0.01255 | 0.01949                       | 0.01788                      | 0.01766 | 0.02291                       | 0.02064                      | 0.02042 | 0.03230                       | 0.02891                      | 0.02834 | 0.03975                       | 0.03309                      | 0.03267 | 0.02859                       | 0.02442                      | 0.02425 |
|                          | 10 - 15               | 0.01051                       | 0.01046                      | 0.01055 | 0.01460                       | 0.01461                      | 0.01475 | 0.01785                       | 0.01737                      | 0.01753 | 0.02736                       | 0.02567                      | 0.02598 | 0.03710                       | 0.03176                      | 0.03216 | 0.02802                       | 0.02429                      | 0.02451 |
|                          | 15 - 20               | 0.01101                       | 0.01019                      | 0.01020 | 0.01513                       | 0.01411                      | 0.01412 | 0.01978                       | 0.01762                      | 0.01764 | 0.02956                       | 0.02576                      | 0.02593 | 0.04397                       | 0.03370                      | 0.03404 | 0.03242                       | 0.02534                      | 0.02552 |
|                          | 20 - 25               | 0.01186                       | 0.00964                      | 0.00956 | 0.01625                       | 0.01336                      | 0.01326 | 0.02157                       | 0.01652                      | 0.01642 | 0.03182                       | 0.02480                      | 0.02485 | 0.04990                       | 0.03143                      | 0.03145 | 0.03690                       | 0.02411                      | 0.02408 |
|                          | 25 - 30               | 0.01590                       | 0.01177                      | 0.01172 | 0.02246                       | 0.01668                      | 0.01664 | 0.02879                       | 0.02024                      | 0.02015 | 0.04073                       | 0.02656                      | 0.02654 | 0.06165                       | 0.03459                      | 0.03457 | 0.04597                       | 0.02752                      | 0.02741 |
|                          | 30 - 35               | 0.01455                       | 0.01101                      | 0.01064 | 0.02062                       | 0.01528                      | 0.01495 | 0.02756                       | 0.01949                      | 0.01901 | 0.04229                       | 0.02355                      | 0.02350 | 0.06577                       | 0.03336                      | 0.03315 | 0.04747                       | 0.02687                      | 0.02621 |
|                          | 35 - 40               | 0.01448                       | 0.00993                      | 0.00898 | 0.02047                       | 0.01367                      | 0.01277 | 0.02813                       | 0.01834                      | 0.01676 | 0.04726                       | 0.02244                      | 0.02234 | 0.07327                       | 0.03252                      | 0.03155 | 0.05237                       | 0.02619                      | 0.02409 |
|                          | > 40                  | 0.01690                       | 0.01464                      | 0.01011 | 0.02404                       | 0.01997                      | 0.01480 | 0.03306                       | 0.04314                      | 0.02064 | 0.06054                       | 0.03302                      | 0.03301 | 0.08867                       | 0.06781                      | 0.04749 | 0.06350                       | 0.07545                      | 0.03505 |
| Mean                     |                       | 0.0152                        | 0.0132                       | 0.0126  | 0.0214                        | 0.0186                       | 0.0179  | 0.0269                        | 0.0242                       | 0.0217  | 0.0378                        | 0.0275                       | 0.0274  | 0.0537                        | 0.0372                       | 0.0350  | 0.0409                        | 0.0327                       | 0.0283  |
