# Supplementary material
Source: MDPI journal article supplement (https://www.mdpi.com/2220-9964/6/9/287)
Supplement: s1 [file s1]

Table S4. Absolute and relative reflectance differences, respect flat terrain for oak, pine and mesophyll forest.

| Forest Sample            |                       |                               |                              |         |       |         |                               |                              |       |         |       |                               |                              |         |       |         |                               |                              |       |         |       |                               |                              |         |       |         |                               |                              |       |         |       |         |       |         |       |         |       |
|--------------------------|-----------------------|-------------------------------|------------------------------|---------|-------|---------|-------------------------------|------------------------------|-------|---------|-------|-------------------------------|------------------------------|---------|-------|---------|-------------------------------|------------------------------|-------|---------|-------|-------------------------------|------------------------------|---------|-------|---------|-------------------------------|------------------------------|-------|---------|-------|---------|-------|---------|-------|---------|-------|
| Sensor Date              | Slope range (Degrees) | Blue                          |                              |         |       |         |                               | Green                        |       |         |       |                               |                              | Red     |       |         |                               |                              |       | NIR     |       |                               |                              |         |       | SWIR-1  |                               |                              |       |         |       | SWIR-2  |       |         |       |         |       |
|                          |                       | Before Topographic Correction | After Topographic Correction |         |       |         | Before Topographic Correction | After Topographic Correction |       |         |       | Before Topographic Correction | After Topographic Correction |         |       |         | Before Topographic Correction | After Topographic Correction |       |         |       | Before Topographic Correction | After Topographic Correction |         |       |         | Before Topographic Correction | After Topographic Correction |       |         |       |         |       |         |       |         |       |
|                          |                       |                               | NSC                          |         | SC    |         |                               | NSC                          |       | SC      |       |                               | NSC                          |         | SC    |         |                               | NSC                          |       | SC      |       |                               | NSC                          |         | SC    |         |                               | NSC                          |       | SC      |       |         |       |         |       |         |       |
| Landsat TM Nov-27-1995   | 0                     | 0.0000                        | 0.0%                         | 0.0000  | 0.0%  | 0.0000  | 0.0%                          | 0.0000                       | 0.0%  | 0.0000  | 0.0%  | 0.0000                        | 0.0%                         | 0.0000  | 0.0%  | 0.0000  | 0.0%                          | 0.0000                       | 0.0%  | 0.0000  | 0.0%  | 0.0000                        | 0.0%                         | 0.0000  | 0.0%  | 0.0000  | 0.0%                          | 0.0000                       | 0.0%  | 0.0000  | 0.0%  | 0.0000  | 0.0%  | 0.0000  | 0.0%  |         |       |
|                          | 0 - 5                 | 0.0003                        | 1.2%                         | 0.0003  | 1.5%  | 0.0004  | 2.0%                          | -0.0013                      | 4.0%  | -0.0012 | 3.7%  | -0.0010                       | 3.2%                         | -0.0002 | 0.6%  | -0.0001 | 0.3%                          | 0.0001                       | 0.3%  | 0.0092  | 4.8%  | 0.0099                        | 5.1%                         | 0.0108  | 5.6%  | -0.0022 | 1.7%                          | -0.0017                      | 1.3%  | -0.0008 | 0.6%  | 0.0036  | 7.0%  | 0.0039  | 7.5%  | 0.0044  | 8.3%  |
|                          | 5 - 10                | 0.0006                        | 2.7%                         | 0.0007  | 3.2%  | 0.0008  | 3.6%                          | -0.0010                      | 3.0%  | -0.0009 | 2.7%  | -0.0008                       | 2.4%                         | 0.0008  | 3.1%  | 0.0010  | 3.6%                          | 0.0011                       | 4.1%  | 0.0226  | 11.8% | 0.0232                        | 12.0%                        | 0.0234  | 12.2% | 0.0013  | 1.0%                          | 0.0017                       | 1.3%  | 0.0024  | 1.8%  | 0.0037  | 7.2%  | 0.0039  | 7.4%  | 0.0043  | 8.2%  |
|                          | 10 - 15               | 0.0012                        | 5.4%                         | 0.0024  | 10.7% | 0.0027  | 12.1%                         | 0.0015                       | 4.9%  | 0.0038  | 12.0% | 0.0042                        | 13.3%                        | 0.0049  | 18.1% | 0.0076  | 28.3%                         | 0.0084                       | 31.1% | 0.0287  | 14.9% | 0.0426                        | 22.1%                        | 0.0420  | 21.8% | 0.0110  | 8.5%                          | 0.0234                       | 18.1% | 0.0262  | 20.2% | 0.0108  | 20.6% | 0.0171  | 32.8% | 0.0193  | 37.0% |
|                          | 15 - 20               | 0.0017                        | 7.8%                         | 0.0030  | 13.6% | 0.0020  | 9.0%                          | 0.0022                       | 7.0%  | 0.0046  | 14.4% | 0.0031                        | 9.7%                         | 0.0052  | 19.1% | 0.0098  | 36.3%                         | 0.0070                       | 26.0% | 0.0356  | 18.5% | 0.0498                        | 25.9%                        | 0.0414  | 21.5% | 0.0129  | 9.9%                          | 0.0253                       | 19.6% | 0.0280  | 21.7% | 0.0112  | 21.4% | 0.0175  | 33.6% | 0.0201  | 38.4% |
|                          | 20 - 25               | 0.0011                        | 4.7%                         | 0.0024  | 10.8% | 0.0025  | 11.4%                         | 0.0008                       | 2.6%  | 0.0030  | 9.5%  | 0.0033                        | 10.2%                        | 0.0035  | 13.0% | 0.0063  | 23.2%                         | 0.0069                       | 25.6% | 0.0294  | 15.3% | 0.0417                        | 21.6%                        | 0.0403  | 20.9% | 0.0077  | 6.0%                          | 0.0196                       | 15.1% | 0.0217  | 16.8% | 0.0085  | 16.2% | 0.0148  | 28.4% | 0.0173  | 33.2% |
|                          | 25 - 30               | 0.0013                        | 5.7%                         | 0.0024  | 10.9% | 0.0024  | 10.8%                         | 0.0010                       | 3.1%  | 0.0027  | 8.4%  | 0.0028                        | 8.8%                         | 0.0037  | 13.9% | 0.0061  | 22.6%                         | 0.0066                       | 24.4% | 0.0295  | 15.3% | 0.0374                        | 19.4%                        | 0.0372  | 19.4% | 0.0088  | 6.8%                          | 0.0191                       | 14.7% | 0.0205  | 15.9% | 0.0087  | 16.7% | 0.0150  | 28.7% | 0.0170  | 32.6% |
|                          | 30 - 35               | 0.0026                        | 11.6%                        | 0.0019  | 8.5%  | 0.0017  | 7.8%                          | 0.0032                       | 10.0% | 0.0014  | 4.4%  | 0.0014                        | 4.4%                         | 0.0060  | 22.3% | 0.0051  | 18.7%                         | 0.0050                       | 18.6% | 0.0447  | 23.2% | 0.0264                        | 13.7%                        | 0.0275  | 14.3% | 0.0212  | 16.4%                         | 0.0132                       | 10.2% | 0.0125  | 9.7%  | 0.0146  | 28.0% | 0.0138  | 26.5% | 0.0134  | 25.7% |
|                          | 35 - 40               | 0.0041                        | 18.3%                        | 0.0011  | 4.8%  | 0.0009  | 4.0%                          | 0.0061                       | 19.3% | 0.0002  | 0.7%  | 0.0000                        | 0.1%                         | 0.0088  | 32.5% | 0.0044  | 16.1%                         | 0.0034                       | 12.6% | 0.0664  | 34.5% | 0.0165                        | 8.6%                         | 0.0177  | 9.2%  | 0.0391  | 30.2%                         | 0.0178                       | 13.8% | 0.0082  | 6.4%  | 0.0227  | 43.5% | 0.0320  | 61.4% | 0.0136  | 26.0% |
|                          | > 40                  | 0.0093                        | 41.8%                        | 0.0004  | 1.7%  | 0.0010  | 4.5%                          | 0.0155                       | 48.8% | -0.0007 | 2.3%  | -0.0005                       | 1.4%                         | 0.0205  | 75.9% | 0.0046  | 17.1%                         | 0.0037                       | 13.6% | 0.1280  | 66.5% | 0.0112                        | 5.8%                         | 0.0122  | 6.4%  | 0.0886  | 68.5%                         | 0.0431                       | 33.3% | 0.0020  | 1.5%  | 0.0469  | 89.9% | 0.0066  | 12.6% | 0.0056  | 10.8% |
| Media Desv. Std.         |                       | 0.0028                        | 9.9%                         | 0.0011  | 6.6%  | 0.0009  | 6.5%                          | 0.0050                       | 10.3% | 0.0021  | 5.8%  | 0.0019                        | 5.4%                         | 0.0060  | 19.8% | 0.0033  | 16.6%                         | 0.0031                       | 15.6% | 0.0360  | 20.5% | 0.0166                        | 13.4%                        | 0.0149  | 13.1% | 0.0273  | 14.9%                         | 0.0137                       | 12.7% | 0.0113  | 9.5%  | 0.0135  | 25.1% | 0.0093  | 23.9% | 0.0073  | 22.0% |
| Forest Sample            |                       |                               |                              |         |       |         |                               |                              |       |         |       |                               |                              |         |       |         |                               |                              |       |         |       |                               |                              |         |       |         |                               |                              |       |         |       |         |       |         |       |         |       |
| Sensor Date              | Slope range (Degrees) | Blue                          |                              |         |       |         |                               | Green                        |       |         |       |                               |                              | Red     |       |         |                               |                              |       | NIR     |       |                               |                              |         |       | SWIR-1  |                               |                              |       |         |       | SWIR-2  |       |         |       |         |       |
|                          |                       | Before Topographic Correction | After Topographic Correction |         |       |         | Before Topographic Correction | After Topographic Correction |       |         |       | Before Topographic Correction | After Topographic Correction |         |       |         | Before Topographic Correction | After Topographic Correction |       |         |       | Before Topographic Correction | After Topographic Correction |         |       |         | Before Topographic Correction | After Topographic Correction |       |         |       |         |       |         |       |         |       |
|                          |                       |                               | NSC                          |         | SC    |         |                               | NSC                          |       | SC      |       |                               | NSC                          |         | SC    |         |                               | NSC                          |       | SC      |       |                               | NSC                          |         | SC    |         |                               | NSC                          |       | SC      |       |         |       |         |       |         |       |
| Landsat ETM+ Dec-02-2000 | 0                     | 0.0000                        | 0.0%                         | 0.0000  | 0.0%  | 0.0000  | 0.0%                          | 0.0000                       | 0.0%  | 0.0000  | 0.0%  | 0.0000                        | 0.0%                         | 0.0000  | 0.0%  | 0.0000  | 0.0%                          | 0.0000                       | 0.0%  | 0.0000  | 0.0%  | 0.0000                        | 0.0%                         | 0.0000  | 0.0%  | 0.0000  | 0.0%                          | 0.0000                       | 0.0%  | 0.0000  | 0.0%  | 0.0000  | 0.0%  | 0.0000  | 0.0%  |         |       |
|                          | 0 - 5                 | 0.0023                        | 10.7%                        | 0.0024  | 10.9% | 0.0025  | 11.4%                         | 0.0006                       | 1.6%  | 0.0007  | 1.8%  | 0.0008                        | 2.3%                         | -0.0025 | 8.0%  | -0.0024 | 7.7%                          | -0.0022                      | 7.0%  | 0.0270  | 13.7% | 0.0273                        | 13.9%                        | 0.0279  | 14.2% | 0.0046  | 3.2%                          | 0.0050                       | 3.5%  | 0.0056  | 3.9%  | 0.0028  | 4.2%  | 0.0030  | 4.6%  | 0.0034  | 5.2%  |
|                          | 5 - 10                | 0.0015                        | 7.0%                         | 0.0015  | 6.8%  | 0.0015  | 6.9%                          | -0.0005                      | 1.5%  | -0.0006 | 1.8%  | -0.0006                       | 1.7%                         | -0.0040 | 12.5% | -0.0040 | 12.7%                         | -0.0025                      | 8.0%  | 0.0351  | 17.9% | 0.0343                        | 17.5%                        | 0.0344  | 17.5% | 0.0032  | 2.2%                          | 0.0027                       | 1.9%  | 0.0030  | 2.1%  | 0.0000  | 0.0%  | -0.0001 | 0.1%  | 0.0002  | 0.2%  |
|                          | 10 - 15               | 0.0027                        | 12.4%                        | 0.0032  | 14.9% | 0.0021  | 9.7%                          | 0.0016                       | 4.4%  | 0.0027  | 7.4%  | 0.0029                        | 7.9%                         | 0.0004  | 1.2%  | 0.0018  | 5.8%                          | 0.0022                       | 6.9%  | 0.0351  | 17.9% | 0.0412                        | 21.0%                        | 0.0411  | 20.9% | 0.0148  | 10.3%                         | 0.0222                       | 15.5% | 0.0221  | 15.4% | 0.0084  | 12.7% | 0.0126  | 18.9% | 0.0138  | 20.7% |
|                          | 15 - 20               | 0.0029                        | 13.3%                        | 0.0034  | 15.5% | 0.0034  | 15.7%                         | 0.0018                       | 5.0%  | 0.0027  | 7.5%  | 0.0028                        | 7.8%                         | 0.0003  | 1.0%  | 0.0015  | 4.9%                          | 0.0018                       | 5.8%  | 0.0375  | 19.1% | 0.0420                        | 21.4%                        | 0.0419  | 21.3% | 0.0145  | 10.1%                         | 0.0207                       | 14.4% | 0.0220  | 15.3% | 0.0072  | 10.8% | 0.0108  | 16.2% | 0.0119  | 18.0% |
|                          | 20 - 25               | 0.0026                        | 11.9%                        | 0.0032  | 14.7% | 0.0032  | 14.6%                         | 0.0014                       | 3.8%  | 0.0025  | 6.8%  | 0.0025                        | 6.8%                         | -0.0008 | 2.4%  | 0.0006  | 1.9%                          | 0.0007                       | 2.4%  | 0.0379  | 19.3% | 0.0430                        | 21.9%                        | 0.0427  | 21.7% | 0.0097  | 6.7%                          | 0.0165                       | 11.5% | 0.0173  | 12.1% | 0.0041  | 6.1%  | 0.0082  | 12.3% | 0.0091  | 13.7% |
|                          | 25 - 30               | 0.0029                        | 13.6%                        | 0.0033  | 15.2% | 0.0032  | 14.7%                         | 0.0021                       | 5.8%  | 0.0027  | 7.4%  | 0.0026                        | 7.1%                         | -0.0008 | 2.4%  | -0.0002 | 0.5%                          | -0.0002                      | 0.5%  | 0.0425  | 21.6% | 0.0446                        | 22.7%                        | 0.0446  | 22.7% | 0.0116  | 8.1%                          | 0.0163                       | 11.4% | 0.0164  | 11.5% | 0.0046  | 6.9%  | 0.0079  | 11.8% | 0.0083  | 12.4% |
|                          | 30 - 35               | 0.0040                        | 18.2%                        | 0.0029  | 13.3% | 0.0028  | 13.0%                         | 0.0043                       | 11.9% | 0.0019  | 5.3%  | 0.0018                        | 5.0%                         | 0.0016  | 4.9%  | -0.0008 | 2.6%                          | -0.0010                      | 3.1%  | 0.0539  | 27.5% | 0.0388                        | 19.8%                        | 0.0391  | 19.9% | 0.0209  | 14.6%                         | 0.0106                       | 7.4%  | 0.0099  | 6.9%  | 0.0092  | 13.8% | 0.0054  | 8.1%  | 0.0047  | 7.1%  |
|                          | 35 - 40               | 0.0049                        | 22.7%                        | 0.0022  | 10.0% | 0.0023  | 10.4%                         | 0.0062                       | 17.2% | 0.0006  | 1.7%  | 0.0006                        | 1.6%                         | 0.0037  | 11.6% | -0.0016 | 5.0%                          | -0.0020                      | 6.3%  | 0.0664  | 33.8% | 0.0306                        | 15.6%                        | 0.0304  | 15.5% | 0.0310  | 21.7%                         | 0.0054                       | 3.8%  | 0.0034  | 2.3%  | 0.0134  | 20.1% | 0.0036  | 5.5%  | 0.0008  | 1.2%  |
|                          | > 40                  | 0.0088                        | 40.7%                        | 0.0015  | 6.8%  | 0.0023  | 10.7%                         | 0.0133                       | 37.0% | -0.0014 | 3.8%  | -0.0005                       | 1.3%                         | 0.0137  | 43.6% | -0.0018 | 5.7%                          | -0.0012                      | 3.8%  | 0.0975  | 49.7% | 0.0136                        | 6.9%                         | 0.0106  | 5.4%  | 0.0732  | 51.0%                         | -0.0050                      | 3.5%  | -0.0029 | 2.0%  | 0.0391  | 58.8% | 0.0024  | 3.6%  | 0.0005  | 0.7%  |
| Media Desv. Std.         |                       | 0.0024                        | 15.0%                        | 0.0011  | 10.8% | 0.0010  | 10.7%                         | 0.0041                       | 8.8%  | 0.0015  | 4.4%  | 0.0014                        | 4.1%                         | 0.0049  | 8.8%  | 0.0018  | 4.7%                          | 0.0016                       | 4.4%  | 0.0257  | 22.0% | 0.0145                        | 16.1%                        | 0.0149  | 15.9% | 0.0213  | 12.8%                         | 0.0092                       | 7.3%  | 0.0092  | 7.2%  | 0.0114  | 13.4% | 0.0044  | 8.1%  | 0.0052  | 7.9%  |
| Forest Sample            |                       |                               |                              |         |       |         |                               |                              |       |         |       |                               |                              |         |       |         |                               |                              |       |         |       |                               |                              |         |       |         |                               |                              |       |         |       |         |       |         |       |         |       |
| Sensor Date              | Slope range (Degrees) | Blue                          |                              |         |       |         |                               | Green                        |       |         |       |                               |                              | Red     |       |         |                               |                              |       | NIR     |       |                               |                              |         |       | SWIR-1  |                               |                              |       |         |       | SWIR-2  |       |         |       |         |       |
|                          |                       | Before Topographic Correction | After Topographic Correction |         |       |         | Before Topographic Correction | After Topographic Correction |       |         |       | Before Topographic Correction | After Topographic Correction |         |       |         | Before Topographic Correction | After Topographic Correction |       |         |       | Before Topographic Correction | After Topographic Correction |         |       |         | Before Topographic Correction | After Topographic Correction |       |         |       |         |       |         |       |         |       |
|                          |                       |                               | NSC                          |         | SC    |         |                               | NSC                          |       | SC      |       |                               | NSC                          |         | SC    |         |                               | NSC                          |       | SC      |       |                               | NSC                          |         | SC    |         |                               | NSC                          |       | SC      |       |         |       |         |       |         |       |
| Landsat OLI Mar-07-2015  | 0                     | 0.0000                        | 0.0%                         | 0.0000  | 0.0%  | 0.0000  | 0.0%                          | 0.0000                       | 0.0%  | 0.0000  | 0.0%  | 0.0000                        | 0.0%                         | 0.0000  | 0.0%  | 0.0000  | 0.0%                          | 0.0000                       | 0.0%  | 0.0000  | 0.0%  | 0.0000                        | 0.0%                         | 0.0000  | 0.0%  | 0.0000  | 0.0%                          | 0.0000                       | 0.0%  | 0.0000  | 0.0%  | 0.0000  | 0.0%  | 0.0000  | 0.0%  |         |       |
|                          | 0 - 5                 | 0.0033                        | 9.9%                         | 0.0033  | 10.0% | 0.0023  | 6.9%                          | 0.0000                       | 0.0%  | 0.0001  | 0.1%  | 0.0002                        | 0.3%                         | -0.0040 | 5.5%  | -0.0039 | 5.4%                          | -0.0037                      | 5.2%  | -0.0062 | 2.7%  | -0.0056                       | 2.5%                         | -0.0045 | 2.0%  | -0.0269 | 11.4%                         | -0.0263                      | 11.2% | -0.0257 | 10.9% | -0.0131 | 9.9%  | -0.0129 | 9.8%  | -0.0126 | 9.5%  |
|                          | 5 - 10                | 0.0007                        | 2.0%                         | 0.0007  | 2.1%  | 0.0007  | 2.2%                          | -0.0029                      | 5.0%  | -0.0030 | 5.1%  | -0.0029                       | 5.0%                         | -0.0091 | 12.5% | -0.0093 | 12.8%                         | -0.0093                      | 12.8% | -0.0068 | 3.0%  | -0.0059                       | 2.6%                         | -0.0053 | 2.3%  | -0.0338 | 14.3%                         | -0.0335                      | 14.2% | -0.0333 | 14.1% | -0.0176 | 13.3% | -0.0176 | 13.3% | -0.0175 | 13.3% |
|                          | 10 - 15               | -0.0008                       | 2.4%                         | 0.0006  | 1.8%  | 0.0007  | 2.2%                          | -0.0047                      | 8.0%  | -0.0024 | 4.1%  | -0.0022                       | 3.7%                         | -0.0102 | 14.0% | -0.0072 | 9.9%                          | -0.0070                      | 9.6%  | -0.0035 | 1.5%  | 0.0034                        | 1.5%                         | 0.0046  | 2.0%  | -0.0216 | 9.2%                          | -0.0113                      | 4.8%  | -0.0101 | 4.3%  | -0.0114 | 8.6%  | -0.0046 | 3.5%  | -0.0040 | 3.1%  |
|                          | 15 - 20               | -0.0013                       | 4.0%                         | 0.0003  | 0.9%  | 0.0003  | 0.9%                          | -0.0060                      | 10.3% | -0.0035 | 5.9%  | -0.0035                       | 5.9%                         | -0.0106 | 14.6% | -0.0071 | 9.8%                          | -0.0071                      | 9.8%  | -0.0031 | 1.4%  | 0.0046                        | 2.0%                         | -0.0064 | 2.8%  | -0.0177 | 7.5%                          | -0.0056                      | 2.4%  | -0.0047 | 2.0%  | -0.0102 | 7.7%  | -0.0022 | 1.7%  | -0.0057 | 4.3%  |
|                          | 20 - 25               | -0.0032                       | 9.6%                         | -0.0017 | 4.9%  | -0.0018 | 5.3%                          | -0.0088                      | 15.0% | -0.0064 | 11.0% | -0.0066                       | 11.3%                        | -0.0150 | 20.7% | -0.0120 | 16.6%                         | -0.0123                      | 16.9% | -0.0050 | 2.2%  | 0.0022                        | 1.0%                         | 0.0024  | 1.1%  | -0.0275 | 11.7%                         | -0.0169                      | 7.2%  | -0.0168 | 7.1%  | -0.0175 | 13.2% | -0.0104 | 7.9%  | -0.0105 | 8.0%  |
|                          | 25 - 30               | -0.0035                       | 10.4%                        | -0.0022 | 6.6%  | -0.0025 | 7.4%                          | -0.0090                      | 15.5% | -0.0072 | 12.4% | -0.0076                       | 13.0%                        | -0.0160 | 22.0% | -0.0143 | 19.7%                         | -0.0146                      | 20.1% | -0.0018 | 0.8%  | 0.0036                        | 1.6%                         | 0.0038  | 1.7%  | -0.0303 | 12.9%                         | -0.0231                      | 9.8%  | -0.     |       |         |       |         |       |         |       |
